# Supplementary material for: A single-enzyme system for starch digestibility screening and its relevance to understanding and predicting the glycaemic index of food products
Source: Royal Society of Chemistry journal article supplement (doi:10.1039/c9fo00603f), 2019-01-01

1

2 OSM 1: Ingredients and Composition of Food

| Sample ID               | Product Description                                                                          | Ingredients (as listed on product packaging)                                                                                                                                                                                                                                                        | Nutrient composition (g/100g as is) |      |      |                |       |         |      |          |
|-------------------------|----------------------------------------------------------------------------------------------|-----------------------------------------------------------------------------------------------------------------------------------------------------------------------------------------------------------------------------------------------------------------------------------------------------|-------------------------------------|------|------|----------------|-------|---------|------|----------|
|                         |                                                                                              |                                                                                                                                                                                                                                                                                                     | Energy (kJ)                         | Fat  | CHO  | of which sugar | Fiber | Protein | Salt | Moisture |
| Biscuit; Digestive      | McVities Fullkorn (wholewheat) Digestive Carr's Large Table Water® (United Biscuits UK Ltd.) | Whole wheat flour (69%), vegetable oil (sunflower, palm), sugar, Raising Agents (Ammonium Bicarbonate, Sodium Bicarbonate, malic acid, salt, partially inverted sugar syrup.                                                                                                                        | 1955                                | 20.8 | 58.1 | 19.1           | 6.5   | 8.3     | 1.5  | 4.8      |
| Biscuit;Water           | Jacobs cornish wafers® (United Biscuits UK Ltd)                                              | Flour (Wheat Flour, Calcium Carbonate, Iron, Niacin, Thiamin), Palm Oil, Salt                                                                                                                                                                                                                       | 1741                                | 7.6  | 73.9 | 1.6            | 4.2   | 10      | 1.5  | 2.8      |
| Biscuit; Cream          |                                                                                              | Flour (Wheat Flour, Calcium, Iron, Niacin, Thiamin), Vegetable Oil (Palm), Wheat Starch, Salt                                                                                                                                                                                                       | 2202                                | 28.8 | 56.7 | 1              | 3     | 8.9     | 0.83 | 1.8      |
| Biscuit; Oatmeal        | Nairn's oatcake                                                                              | *Combination of fine and rough oatcakes*; <u>Fine</u> : Wholegrain Oats (88%), Sustainable Palm Fruit Oil, Sea Salt, Raising Agent: Sodium Bicarbonate. <u>Rough</u> : Wholegrain Oats (90%), Sunflower Oil, Sustainable Palm Fruit Oil, Sea Salt, Raising Agent: Sodium Bicarbonate                | 1911                                | 18.5 | 55.3 | 0.85           | 9.85  | 10.6    | 1.57 | 4.2      |
| Biscuit;Tea             | Lyon's Rich Tea malted barley biscuits (Burton's Biscuit Co)                                 | Wheat Flour, Sugar, Vegetable Oil, Malted Barley Extract, Raising Agents (Ammonium Bicarbonate, Sodium Bicarbonate, E450), Glucose Syrup, Salt, Preservative (E223)                                                                                                                                 | 1899                                | 14.2 | 72.1 | 19.1           | 2.9   | 7.2     | 0.27 | 3.3      |
| Bread; Sunflower&Barley | Sunflower and Barley Bread (Vogels)                                                          | Water, Wheat Flour, Mixed Grains (15%) (Wheat, Rye), Sunflower Seeds (6%), Barley (3%), Wheat Gluten, Canola Oil, Yeast, Iodised Salt, Skim Milk Powder, White Vinegar, Cultured Wheat                                                                                                              | 1070                                | 6.6  | 37.1 | 2.5            | 3.7   | 9.7     | 0.38 | 42.5     |
| Bread; Wholemeal        | Wholemeal Bread Sliced 440g                                                                  | Wholemeal Wheat Flour, Water, Wheat Gluten, Yeast, Salt, Spirit Vinegar, Emulsifier (Mono- and Di-Acetyltartaric Esters of Mono- and Di-Glycerides of Fatty Acids), Soya Flour, Rapeseed Oil, Caramelised Sugar, Preservative (Calcium Propionate), Palm Oil, Flour Treatment Agent (Ascorbic Acid) | 972                                 | 2.5  | 36.9 | 2.9            | 6.9   | 11.6    | 0.97 | 41.1     |

|                         |                                                                       |                                                                                                                                                                                                                                                                                                                                                                                               |      |     |      |      |     |     |       |      |
|-------------------------|-----------------------------------------------------------------------|-----------------------------------------------------------------------------------------------------------------------------------------------------------------------------------------------------------------------------------------------------------------------------------------------------------------------------------------------------------------------------------------------|------|-----|------|------|-----|-----|-------|------|
| Bread; White            | Medium sliced white bread.                                            | Wheat Flour (Wheat Flour, Calcium Carbonate, Iron, Niacin, Thiamin), Water, Yeast, Salt, Rapeseed Oil, Spirit Vinegar, Emulsifiers (Mono- and Di-Acetyl Tartaric Acid Esters of Mono- and Di-Glycerides of Fatty Acids), Sodium Stearoyl-2-Lactylate, Mono- and Di-Glycerides of Fatty Acids), Soya Flour, Preservative (Calcium Propionate), Palm Oil, Flour Treatment Agent (Ascorbic Acid) | 1012 | 2.2 | 45.6 | 2.5  | 2.3 | 8.1 | 0.88  | 40.9 |
| Cereal; Cornflakes      | Toasted flakes of golden corn                                         | Maize, Sugar, Barley Malt Flavouring, Salt, Vitamins & Minerals: Niacin, Iron, Vitamin B6, Vitamin B2 (Riboflavin), Vitamin B1 (Thiamin), Folic Acid, Vitamin D, Vitamin B12                                                                                                                                                                                                                  | 1604 | 0.9 | 84   | 8    | 3   | 7   | 1.13  | 4.0  |
| Cereal; Rice pops       | Puffed rice fortified with vitamins & iron                            | Rice, Sugar, Barley Malt Extract, Salt, ND In Ingrid Dec - Processing Aid: Mono- and Diglycerides of Fatty Acids, Vitamins and Mineral Mix (ND In Ingrid Dec - Carrier; Dextrose), Niacin, Iron, Thiamin, Pantothenic Acid, Riboflavin, Vitamin B6, Folic Acid, Vitamin D, Vitamin B12).                                                                                                      | 1671 | 1.3 | 88.5 | 9.5  | 1.3 | 6.4 | 0.7   | 1.8  |
| Cereal; Balance         | Toasted rice and wheat cereal flakes fortified with vitamins and iron | Rice (71%), Wheat (24%), Sugar, Barley Malt Extract, Salt, Niacin, Thiamin, Vitamin D, Iron, Vitamin B12, Pantothenic Acid, Riboflavin, Folic Acid, Vitamin B6                                                                                                                                                                                                                                | 1619 | 0.9 | 84.8 | 15.2 | 2.7 | 7.2 | 0.7   | 3.7  |
| Pasta; Spaghetti        | Napolina Short Spaghetti                                              | 100% Durum Wheat Semolina                                                                                                                                                                                                                                                                                                                                                                     | 601  | 0.6 | 31.5 | 1    | 1.5 | 4.4 | 0.003 | 62.0 |
| Potato; King Edward     | King Edward Potato                                                    | King Edward Potatoes                                                                                                                                                                                                                                                                                                                                                                          | 343  | 0.5 | 17.5 | 0.8  | 1.6 | 1.8 | 0.02  | 78.6 |
| Potato; Charlotte       | Charlotte Potato                                                      | Charlotte Potatoes                                                                                                                                                                                                                                                                                                                                                                            | 345  | 0.5 | 17.5 | 0.8  | 1.6 | 1.8 | 0.01  | 78.6 |
| Pulse; Chickpea         | Chickpeas in Water (canned)                                           | Chickpeas, Water, Antioxidant: Sodium Metabisulphite (Sulphites).                                                                                                                                                                                                                                                                                                                             | 512  | 1.4 | 16.5 | 0.5  | 6.1 | 7.7 | 0.03  | 68.3 |
| Pulse; Brown lentil     | Brown Lentils in Water (canned)                                       | Brown lentils, Water, Acidity Regulator: Ascorbic Acid, Firming Agent: Calcium chloride                                                                                                                                                                                                                                                                                                       | 362  | 0.7 | 10   | 0.1  | 7.8 | 6.1 | 0.05  | 75.4 |
| Pulse; Butterbean       | Butter beans in Water (canned)                                        | Butter Beans, Water, Firming Agent: Calcium Chloride; Antioxidant: Sodium Metabisulphite (Sulphites).                                                                                                                                                                                                                                                                                         | 453  | 0.7 | 14.8 | 0.5  | 7.3 | 6.9 | 0.03  | 70.3 |
| Rice; Long Grain        | Easy Cook' Parboiled Long Grain White Rice                            | Parboiled Long Grain Rice (100%)                                                                                                                                                                                                                                                                                                                                                              | 495  | 0.5 | 25.1 | 0.2  | 1.2 | 2.6 | 0.01  | 70.6 |
| Vegetable; Garden pea   | Garden Peas (Frozen)                                                  | Garden peas                                                                                                                                                                                                                                                                                                                                                                                   | 285  | 0.7 | 7.5  | 4.9  | 6   | 4.9 | 0.01  | 80.9 |
| Vegetable; Sweet Potato | Sweet Potato                                                          | Sweet Potatoes                                                                                                                                                                                                                                                                                                                                                                                | 358  | 0.3 | 20.5 | 11.6 | 2.3 | 1.1 | 0.04  | 75.8 |

**OSM 2: Scatter plots showing relationship between in vitro digestibility indices and in vivo Glycaemic Index (GI), with error bars as 95% confidence intervals.**

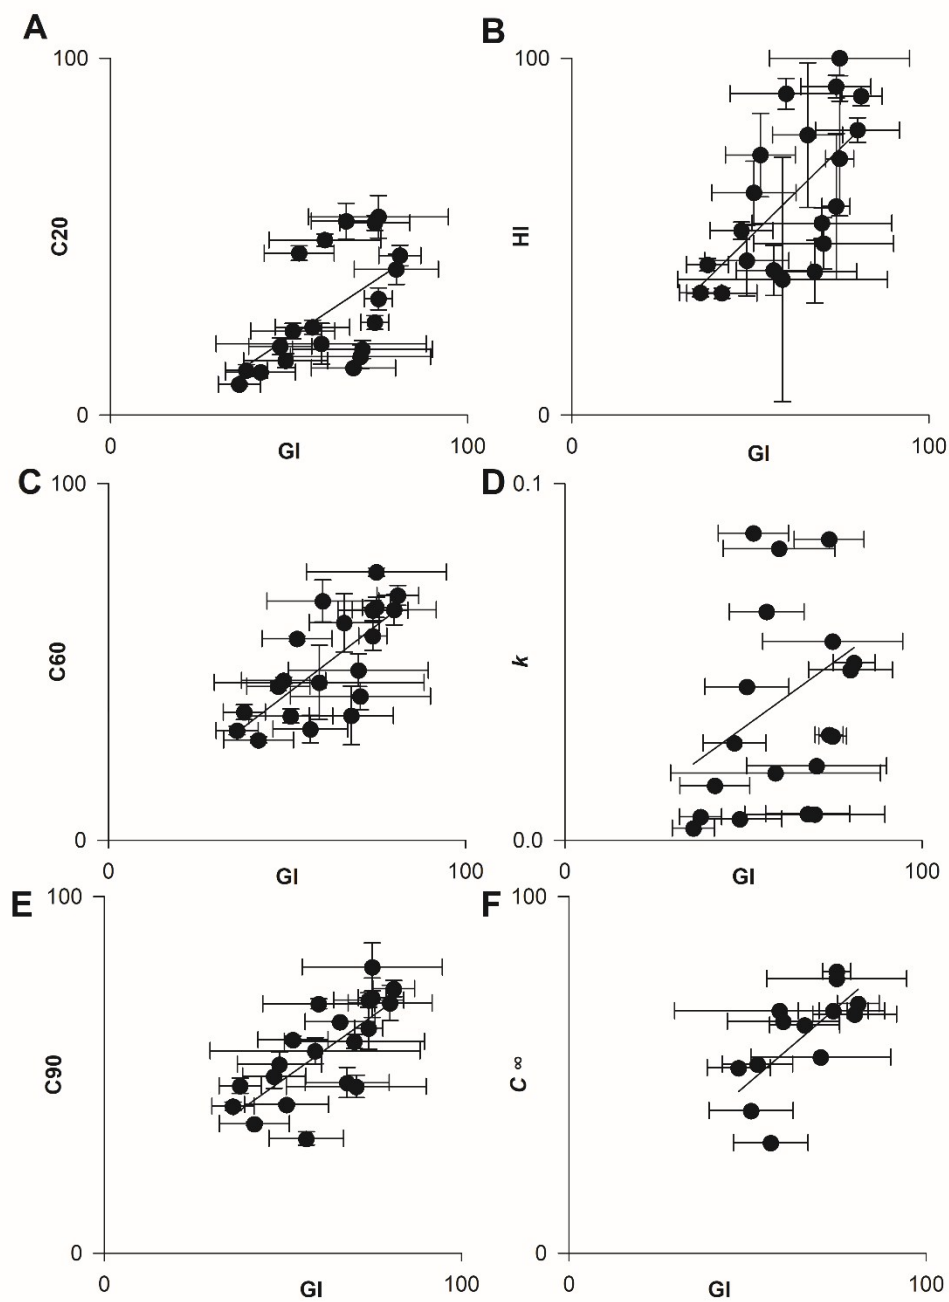

Supplement: c9fo00603f1.pdf [file c9fo00603f1.pdf]
